# Supplementary material for: Increased antitumor efficacy of PD-1-deficient melanoma-specific human lymphocytes
Source: PubMed Central journal article supplement (PMC7057432; doi:10.1136/jitc-2019-000311), 2020-01-29

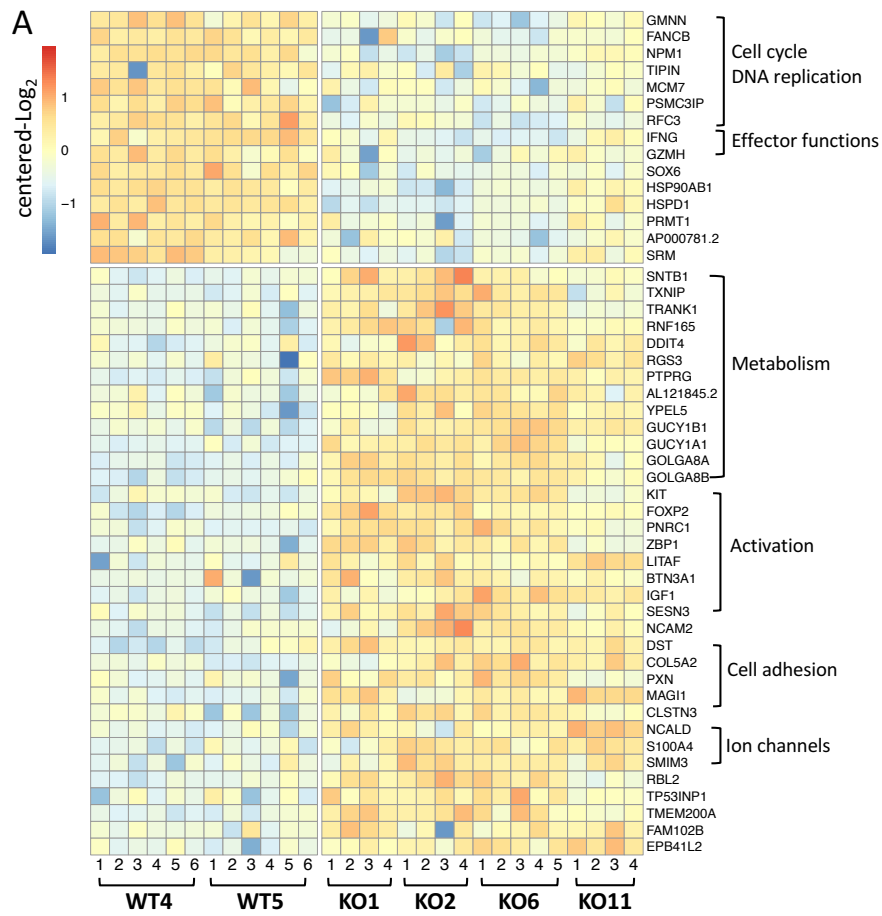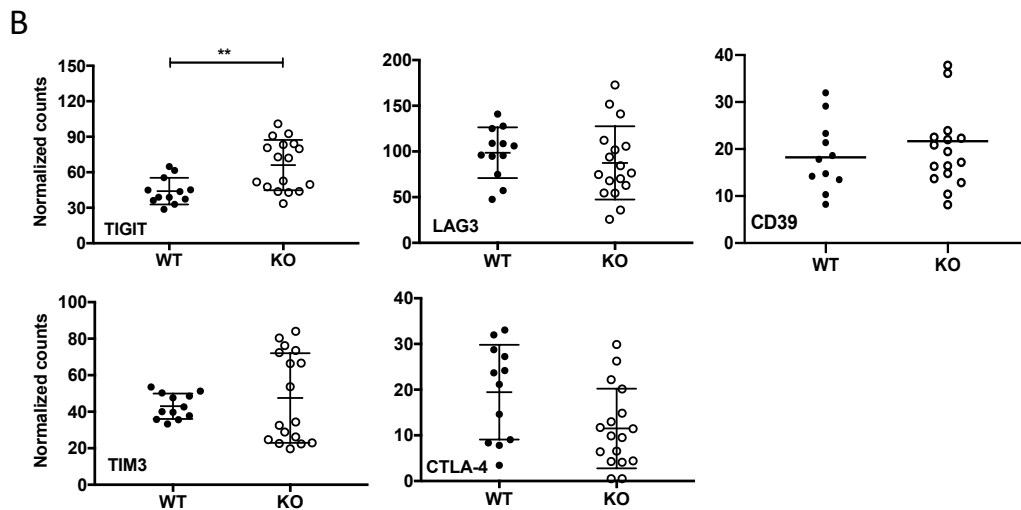

Supplement: jitc-2019-000311supp003.pdf [file jitc-2019-000311supp003.pdf]
